# Supplementary material
Source: PubMed Central journal article supplement (PMC2966881)
Supplement: 447-s1.pdf [file 447-s1.pdf]

## Appendix 1 Prolonged work- and computer-related seated immobility and risk of venous thromboembolism

**Table A**

**Australian and New Zealand Standardised Occupational Classification Codes**

*1. Managers:*

General managers, chief executives, company directors, legislators, farmers and farm managers, specialist managers, hospitality and retail/sales managers.

*2. Professionals:*

Professionals working in the areas of arts and design, media, business, human resource and marketing, engineering, science, transport, education, health, IT, and legal services.

*3. Technicians and trade workers:*

Engineering, computing and science technicians, electricians, hairdressers, animal handlers, and trade workers in the automotive, construction, food, telecommunication, electronics, horticultural industries.

*4. Community and personal service workers:*

Health and welfare support workers, personal care assistants, child minders, educational aides, hospitality workers, defensive and emergency force members, prison and security officers, sports and fitness centre workers.

*5. Clerical and administrative workers:*

Office managers, program administrators, secretaries, receptionists, and clerical/ administration staff.

*6. Sales workers:*

Sales representatives and agents, retail assistants, checkout operators, and office chasers.

*7. Machinery operators and drivers:*

Mobile and stationary plant operators, store-persons, and drivers of automobiles, taxis, buses, trains, delivery vans, and trucks.

*8. Labourers:*

Construction and mining labourers, cleaners and laundry workers, packers, shelf fillers, product assemblers, food preparation assistants, freight handlers, food process workers, farm and forestry workers.
